# Supplementary material for: Hypoxia induces epithelial-mesenchymal transition in colorectal cancer cells through ubiquitin-specific protease 47-mediated stabilization of Snail: A potential role of Sox9
Source: PubMed Central journal article supplement (PMC5698333; doi:10.1038/s41598-017-15139-5), 2017-11-21
Supplement: 41598_2017_15139_MOESM1_ESM.pdf [file 41598_2017_15139_MOESM1_ESM.pdf]

# Supplementary Information

## **Hypoxia induces epithelial-mesenchymal transition in colorectal cancer cells through ubiquitin-specific protease 47-mediated stabilization of Snail: A potential role of Sox9**

Bae-Jung Choi<sup>1</sup>, Sin-Aye Park<sup>1</sup>, Sung-Young Lee<sup>2</sup>, Young Nam Cha<sup>3</sup> and Young-Joon Surh<sup>1,2,4</sup>

<sup>1</sup>Tumor Microenvironment Global Core Research Center, Seoul National University, Seoul 08826,  
Republic of Korea

<sup>2</sup>Department of Molecular Medicine and Biopharmaceutical Sciences, College of Pharmacy, Seoul  
National University, Seoul 08826, Republic of Korea

<sup>3</sup>Department of Pharmacology and Toxicology, Inha University School of Medicine, Incheon 22212,  
Republic of Korea

<sup>4</sup>Cancer Research Institute, Seoul National University, Seoul 03080, Republic of Korea

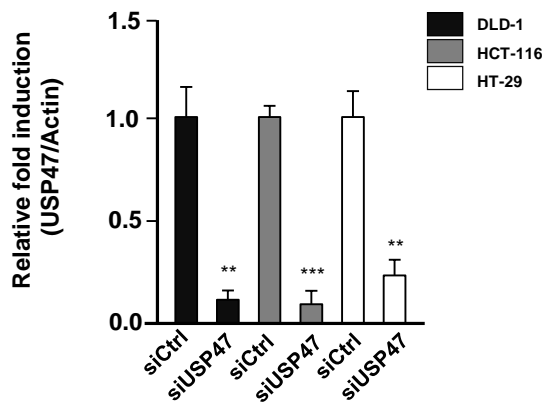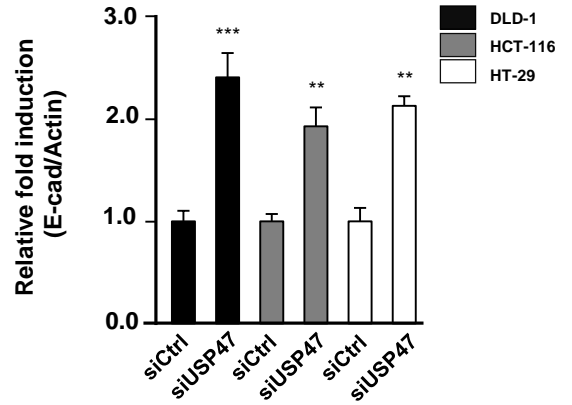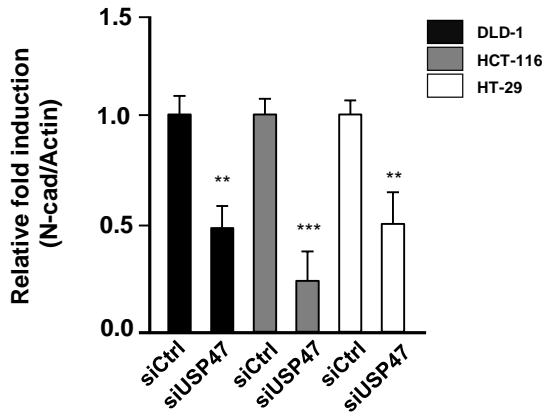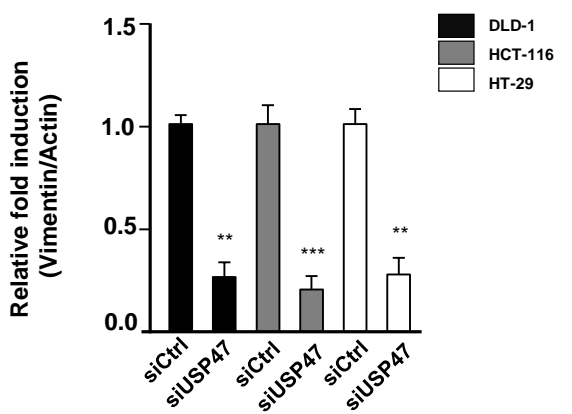

**Supplementary Figure 1.** The quantitation of representative EMT proteins expressed after silencing of USP47 in CRC cells.

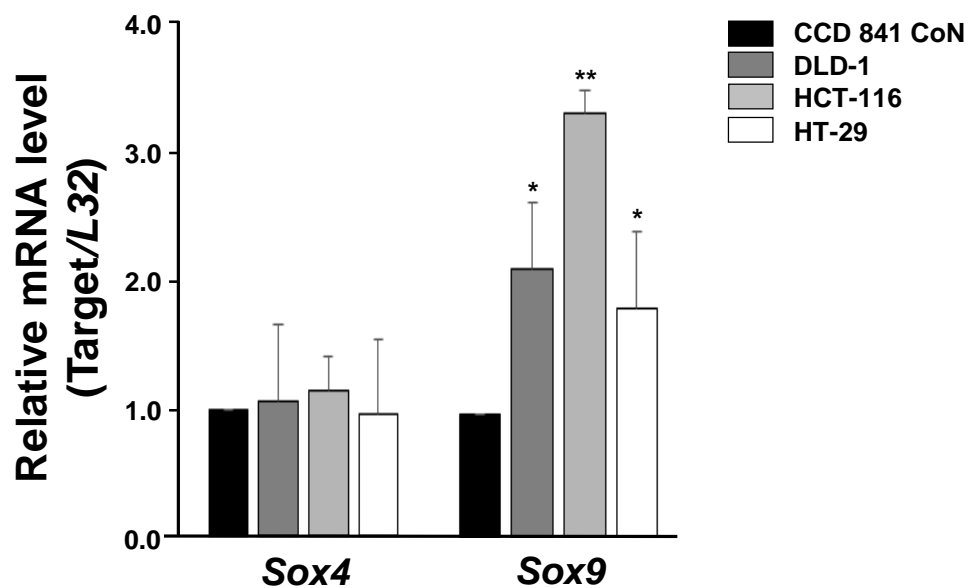

**Supplementary Figure 2.** The elevated expression of Sox9 mRNA in CRC cells.

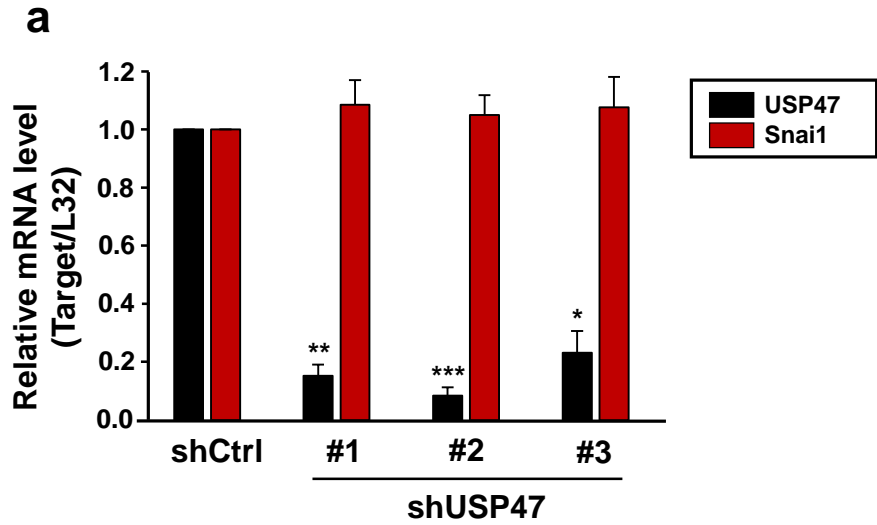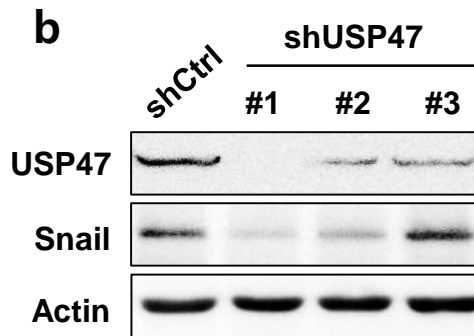

**Supplementary Figure 3.** The establishment of a stable DLD-1 cell line transfected with shUSP47.

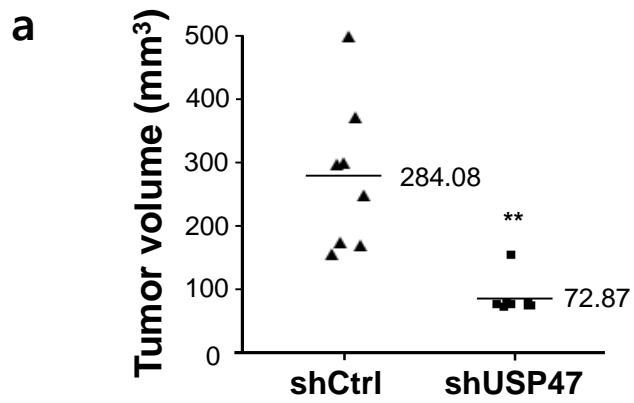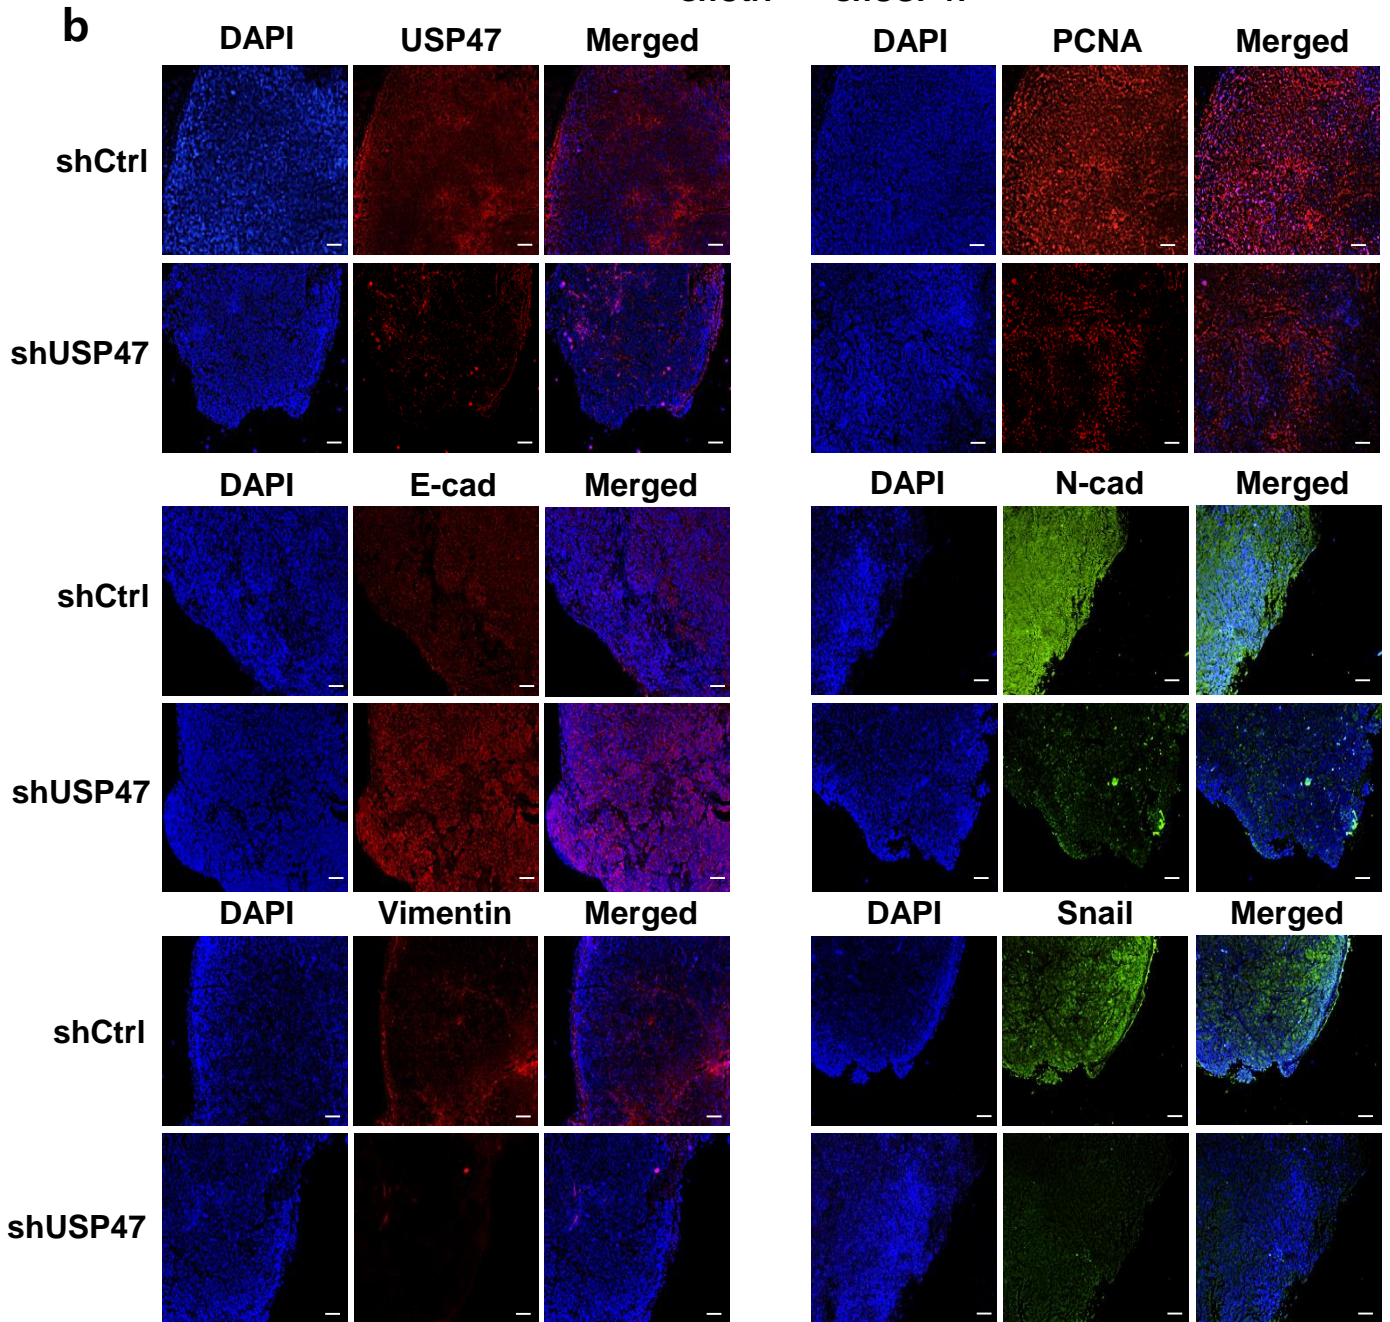

**Supplementary Figure 4.** Effects of USP47 knockdown on xenograft tumor growth and expression of EMT marker proteins.

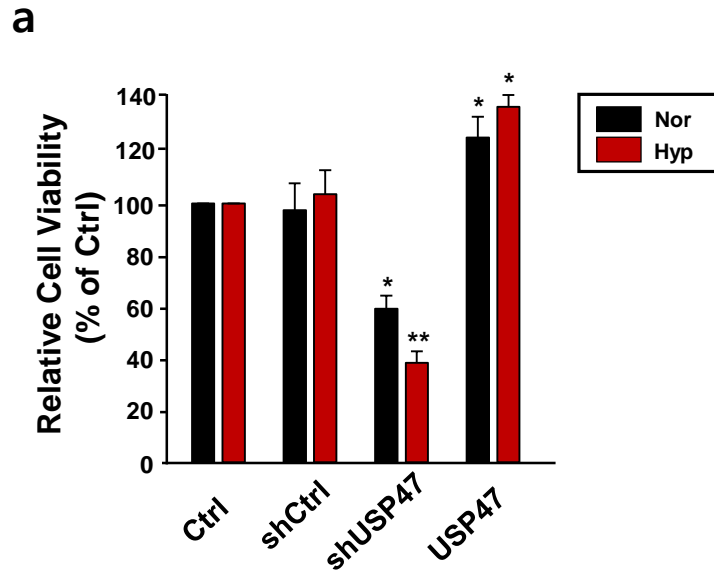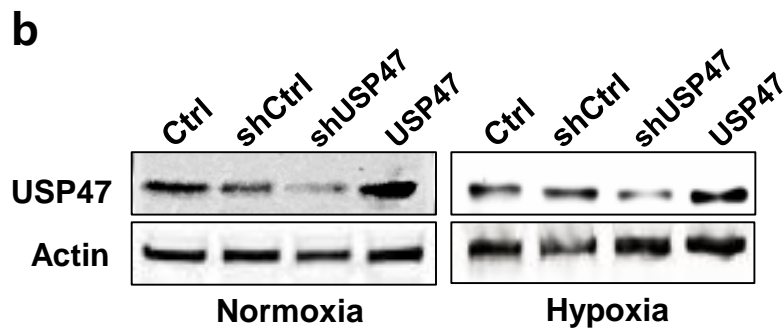

**Supplementary Figure 5.** The effects of silencing or overexpression of USP47 on the CRC cell viability.

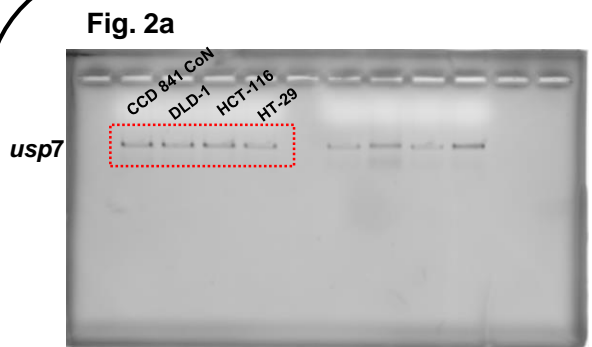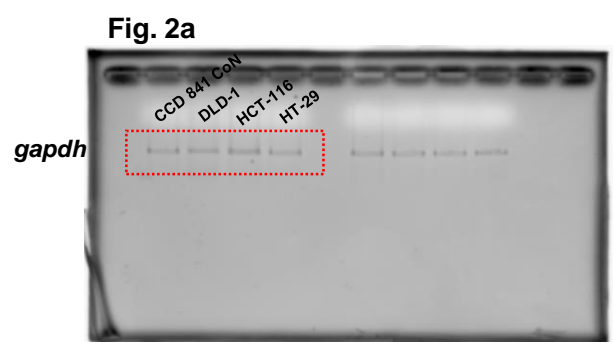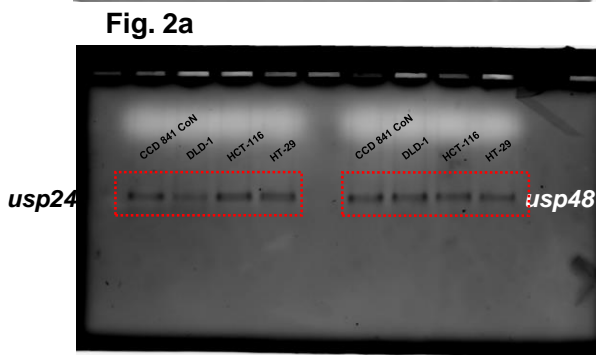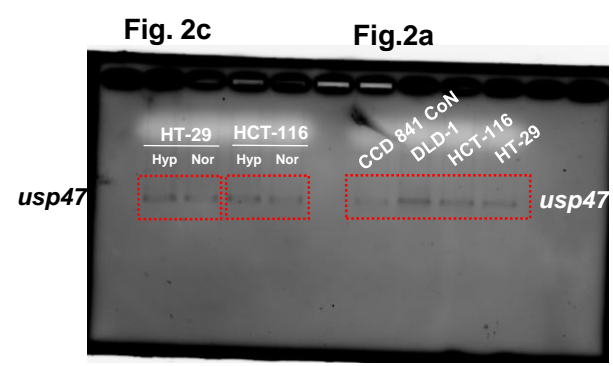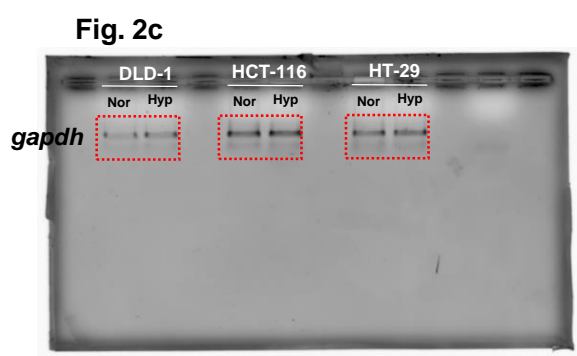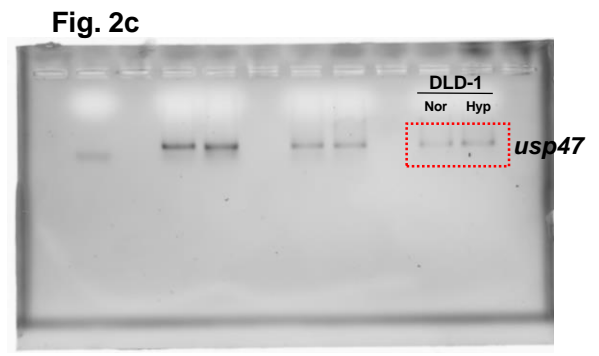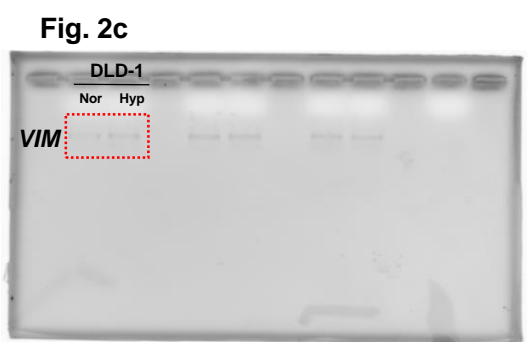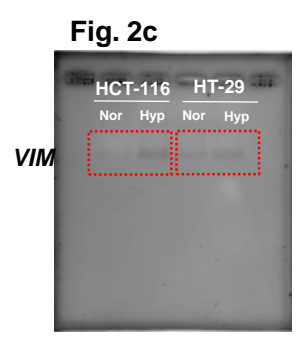

**Supplementary Figure 6.** Unprocessed full-length blots corresponding to Fig. 2. Bands in the red box are presented in Fig. 2a and c.

Fig. 2c

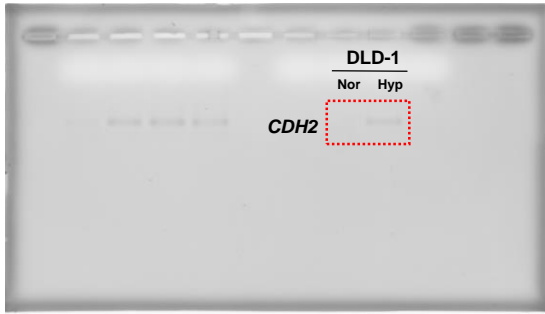

Fig. 2c

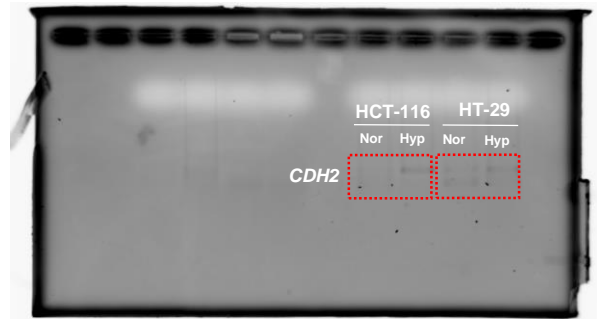

Fig. 2c

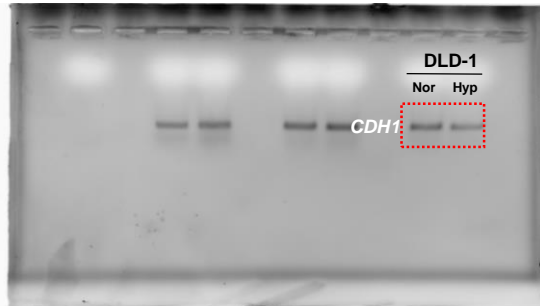

Fig. 2c

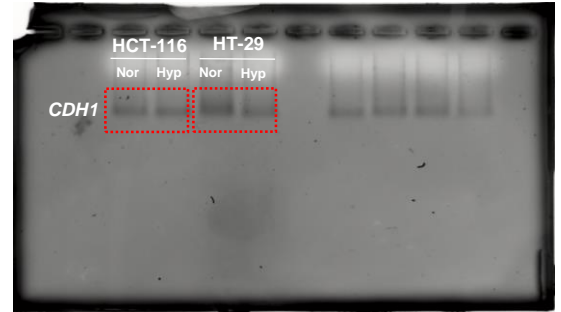

Fig. 2c

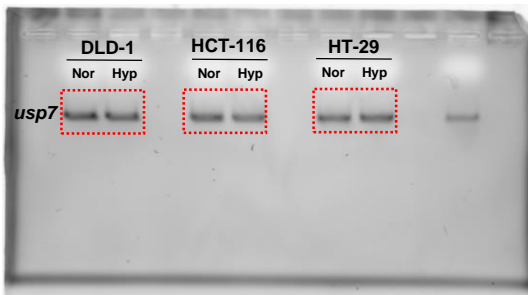

**Supplementary Figure 6 (continued).** Unprocessed full-length blots corresponding to Fig. 2. Bands in the red box are shown in Fig. 2c.



**Fig. 2b**

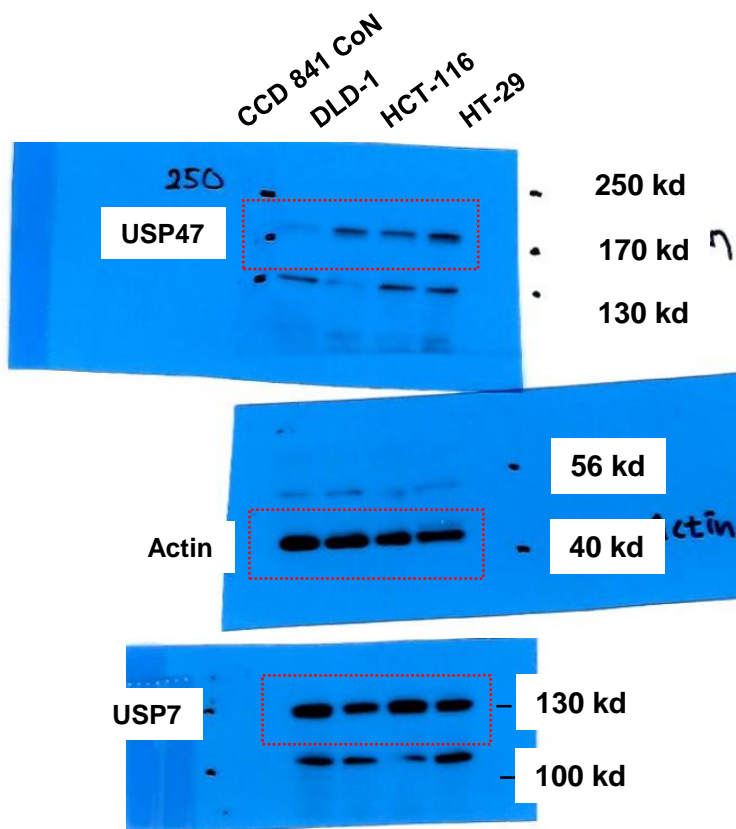

**Supplementary Figure 6 (continued).** Unprocessed full-length Western blots corresponding to Fig. 2. Bands in the red box are shown in Fig. 2b.

**Fig. 2d**

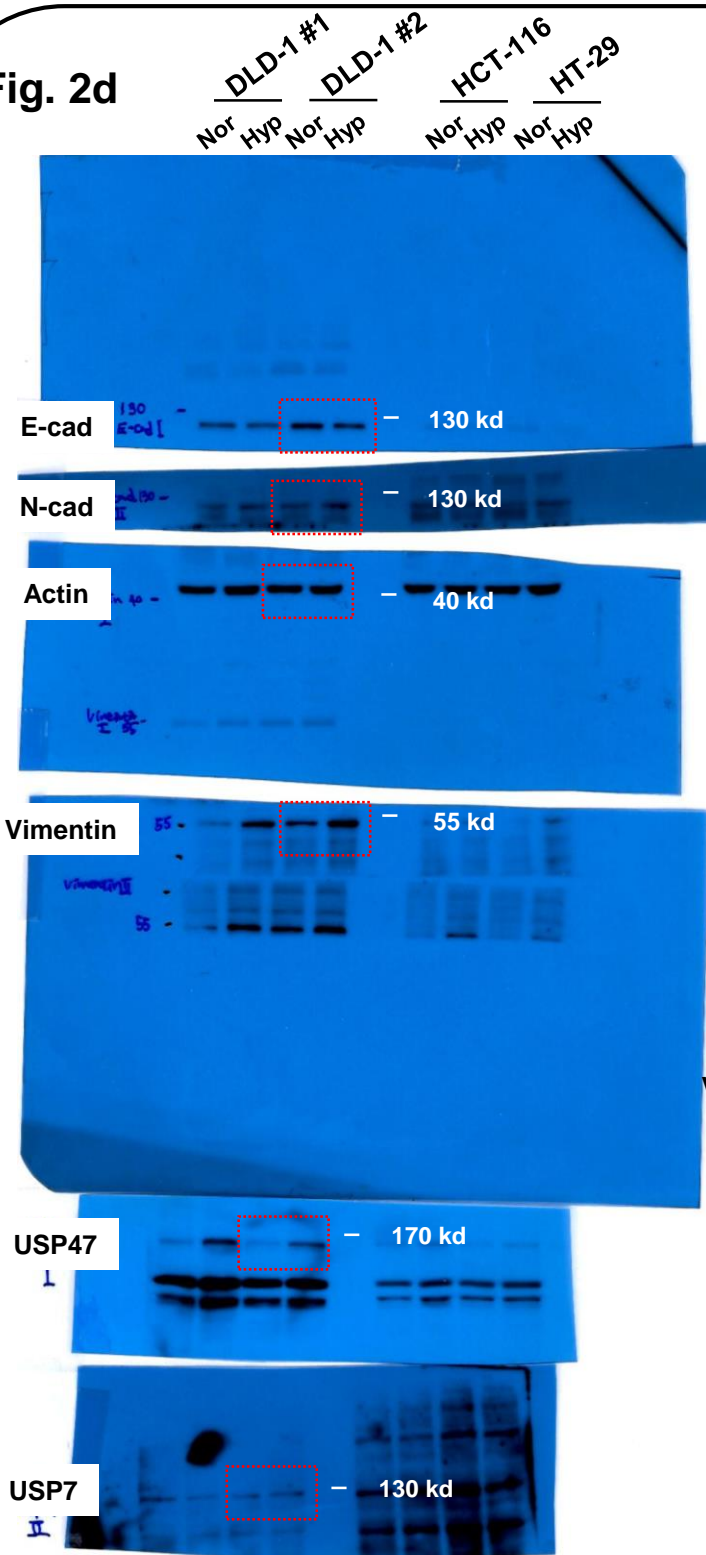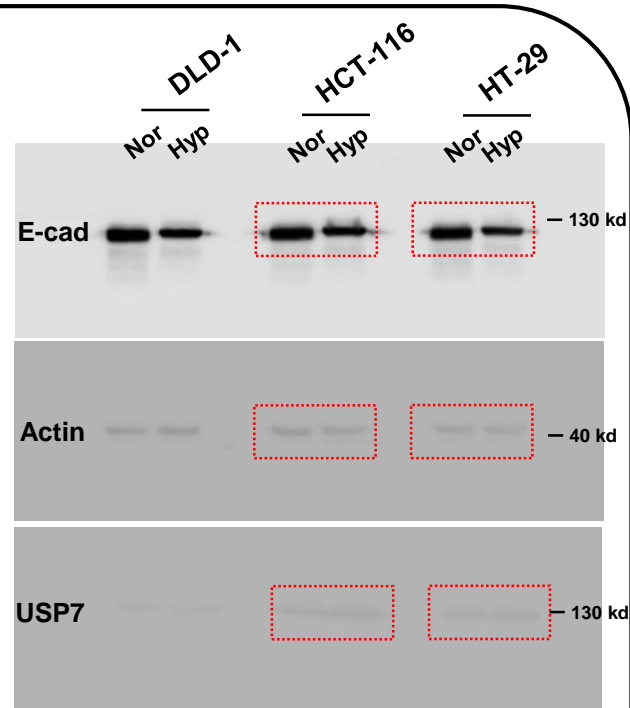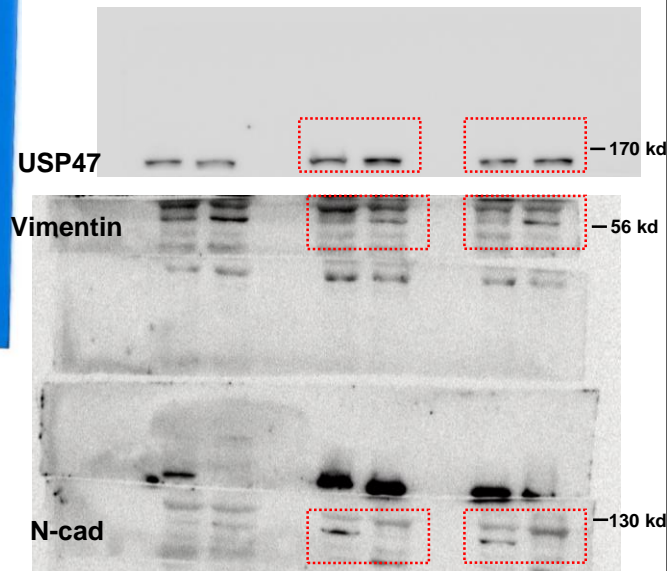

**Supplementary Figure 6 (continued).** Unprocessed full-length Western blots corresponding to Fig. 2. Bands in the red box are shown in Fig. 2d.

**Fig. 3a**

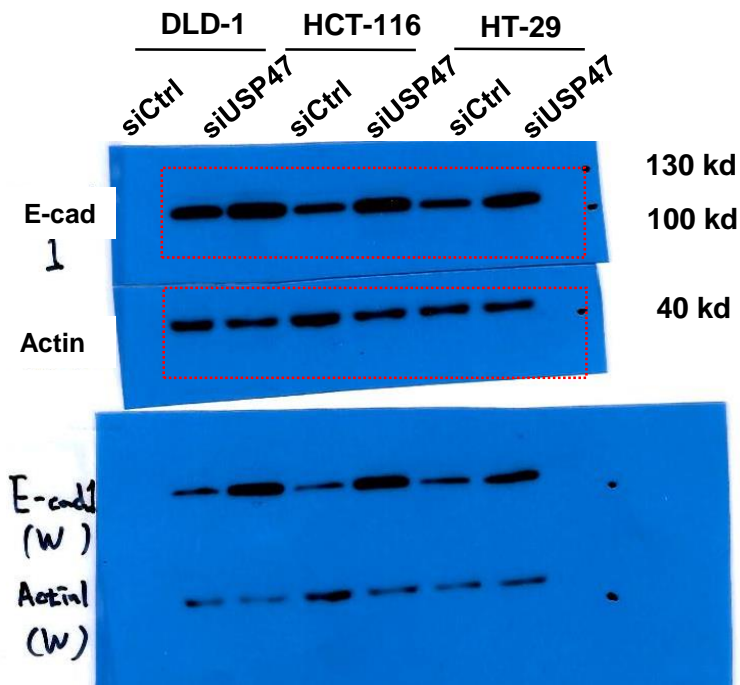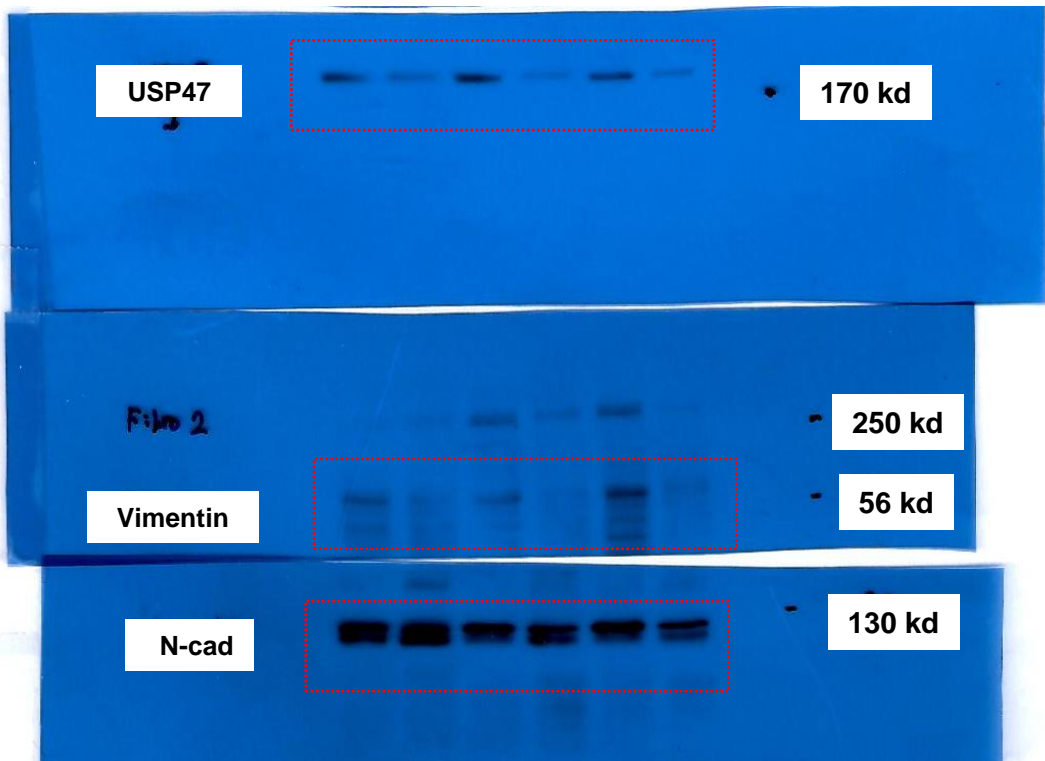

**Supplementary Figure 6 (continued).** Unprocessed full-length Western blots corresponding to Fig. 3. Bands in the red box are shown in Fig. 3a.

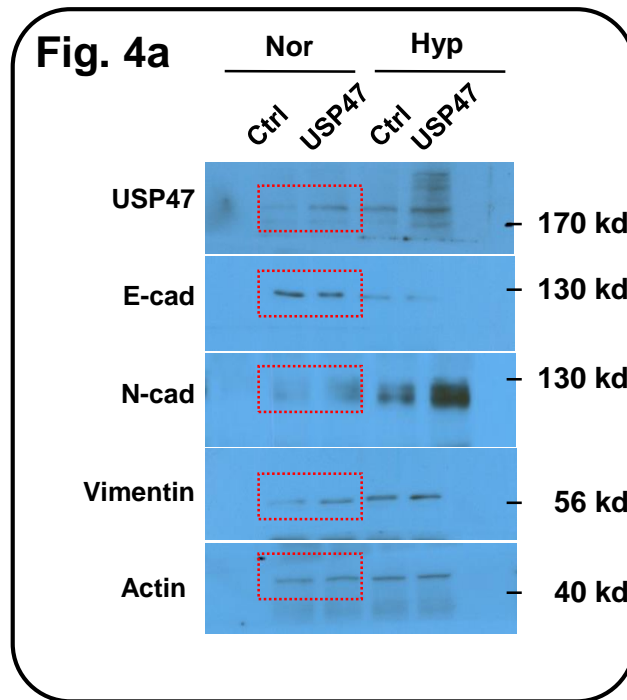

**Fig. 5a**

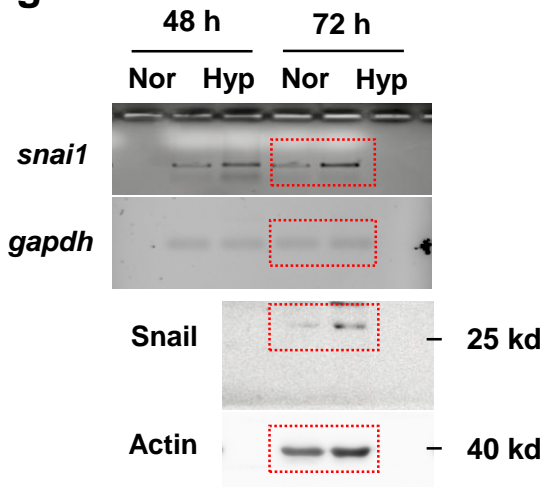

**Fig. 5b**

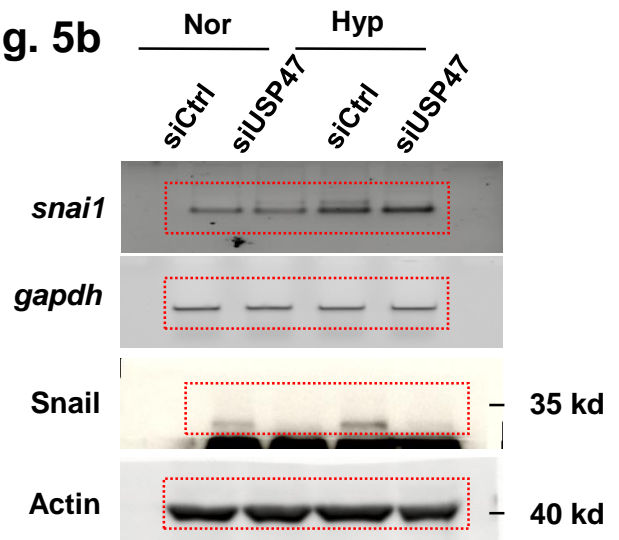

**Supplementary Figure 6 (continued).** Unprocessed full-length blots corresponding to Fig. 4 and 5. Bands in the red box are shown in Fig. 4a, 5a and 5b.

**Fig. 5c**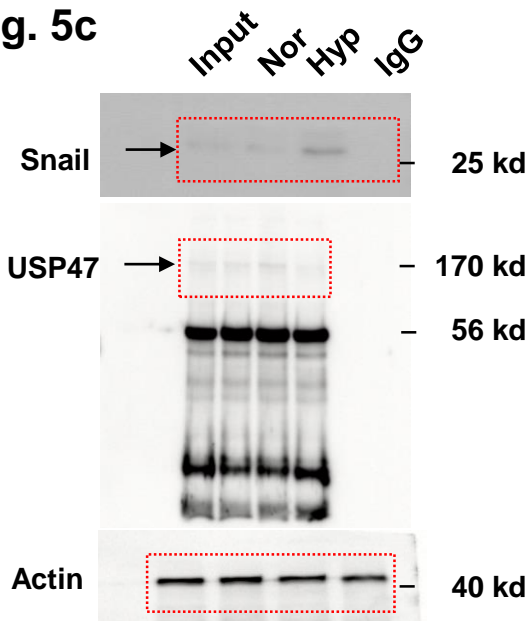**Fig. 5e**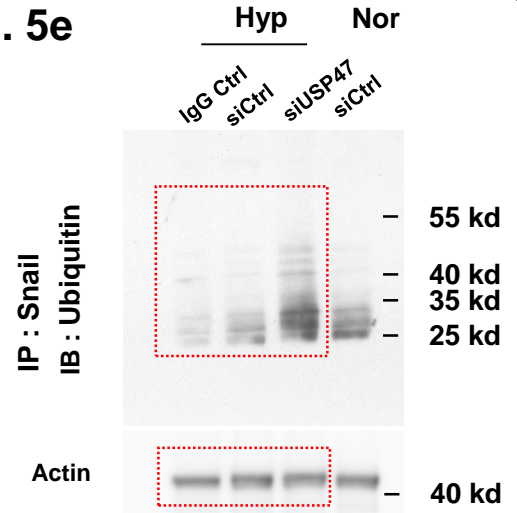**Fig. 5f**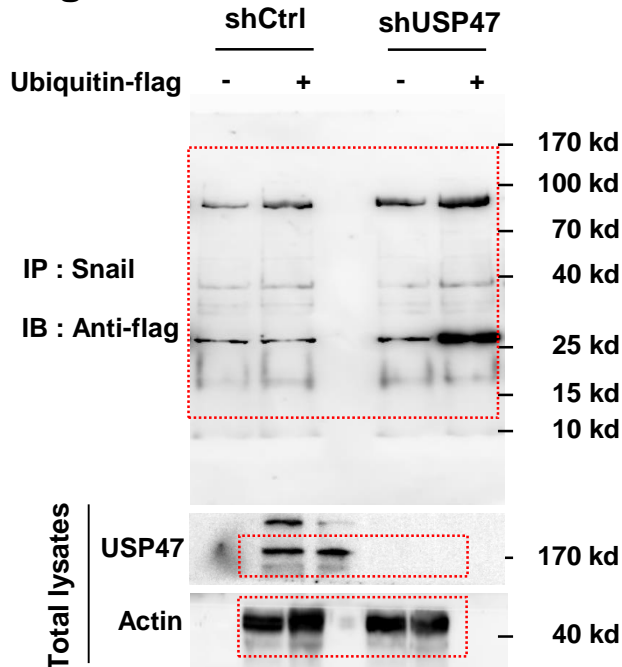

**Supplementary Figure 6 (continued).** Unprocessed full-length Western blots corresponding to Fig. 5. Bands in the red box are shown in Fig. 5c, e and f.

**Fig. 6a**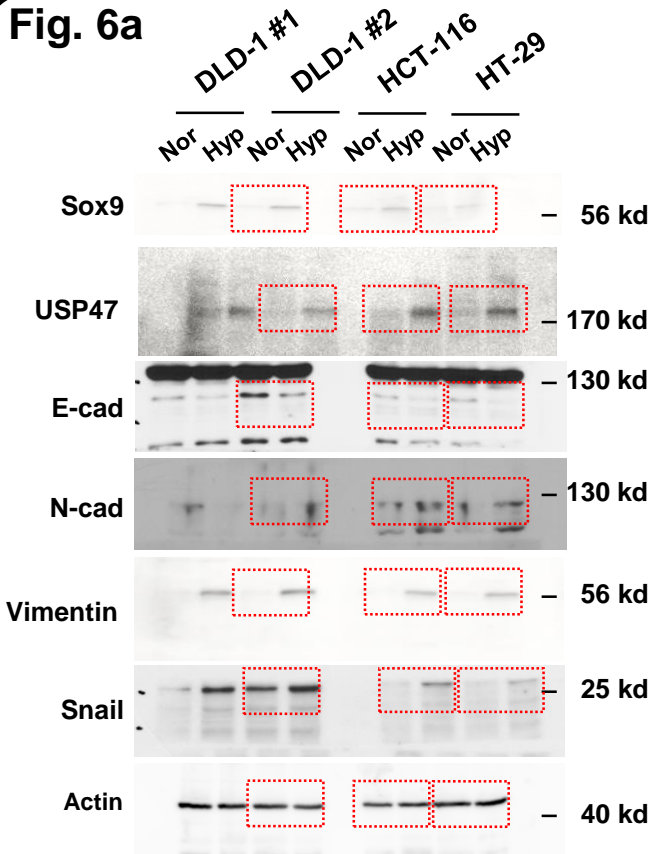**Fig. 6d**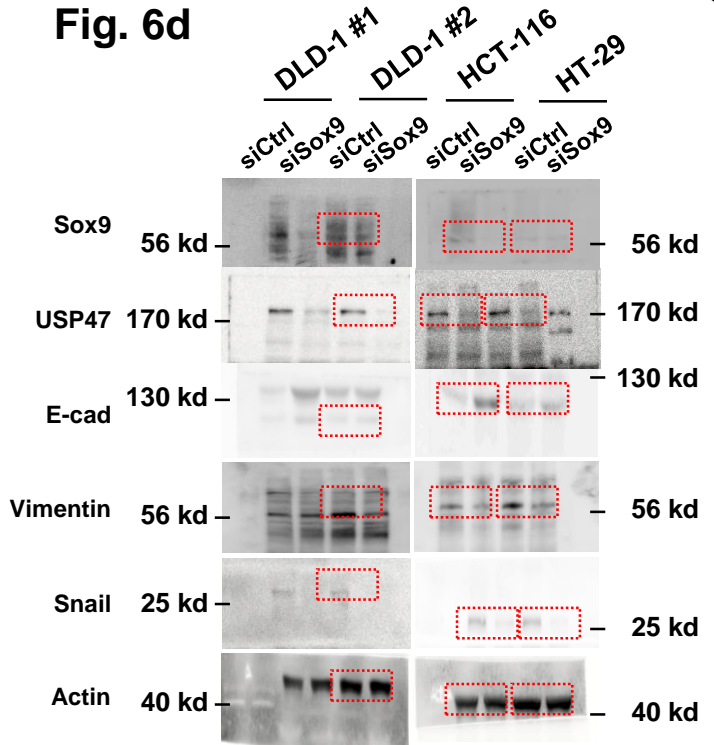

**Supplementary Figure 6 (continued).** Unprocessed full-length Western blots corresponding to Fig. 6. Bands in the red box are shown in Fig. 6a and d.



**Fig. 6f**

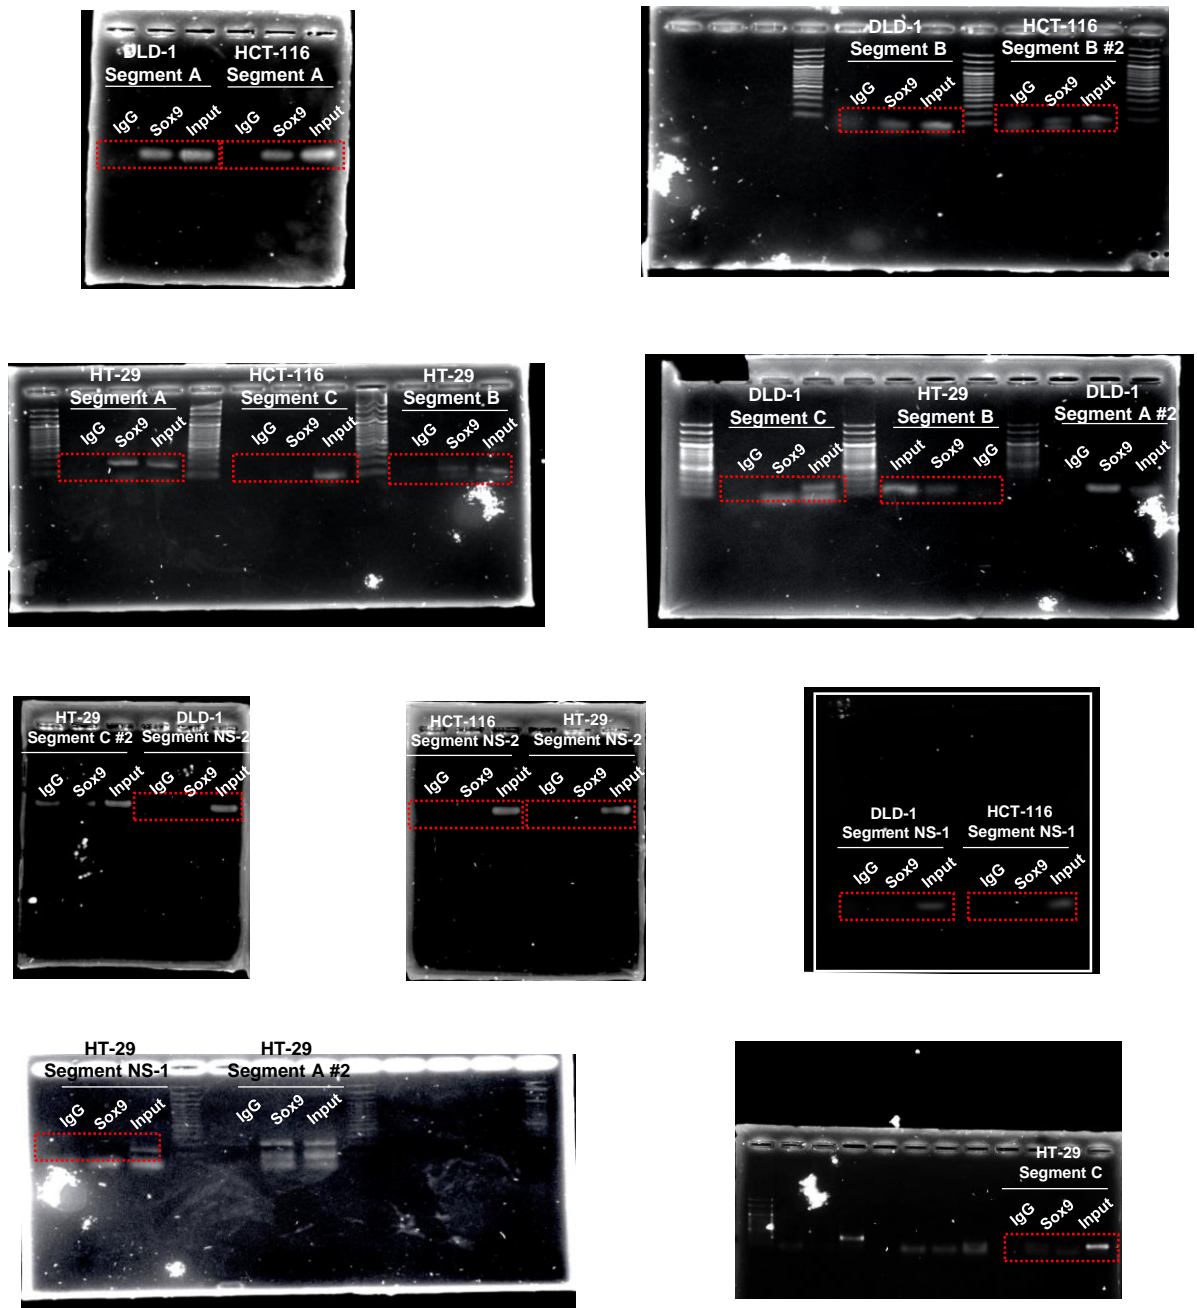

**Supplementary Figure 6 (continued).** Unprocessed full-length blots corresponding to Fig. 6. Bands in the red box are shown in Fig. 6f.

**Fig. 7d**

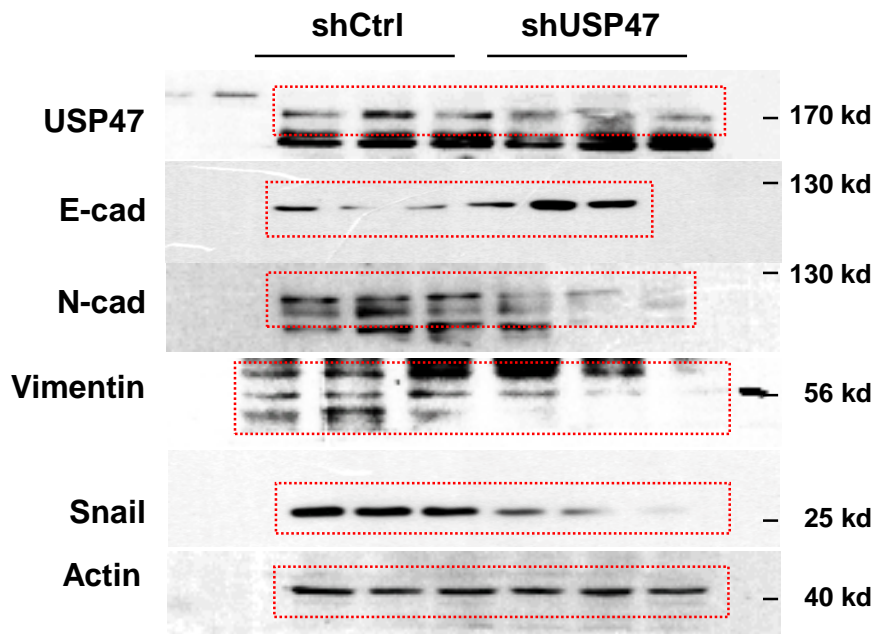

**Supplementary Figure 6 (continued).** Unprocessed full-length Western blots corresponding to Fig. 7. Bands in the red box are shown in Fig. 7d.
